# Supplementary material for: Source regions contributing to excess reactive nitrogen deposition in the Greater Yellowstone Area (GYA) of the United States
Source: Copernicus journal article supplement (doi:10.5194/acp-2018-372), 2018-04-27
Supplement: Supplementary file 1 [file acp-2018-372-supplement.pdf]

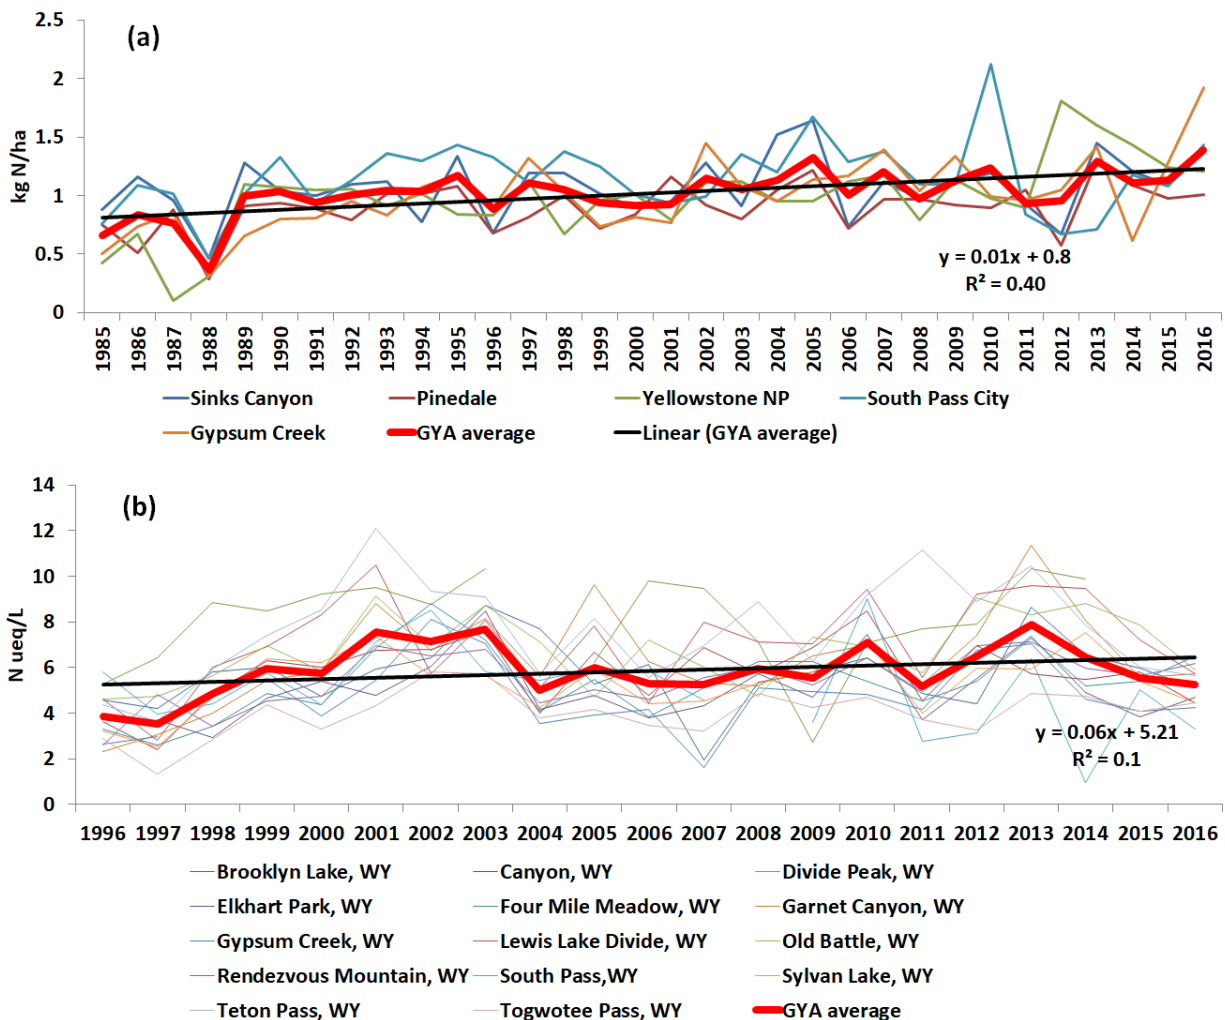

Figure S1. (a) Annual trend of measured wet  $N_f$  deposition measured at National Trend Network (NTN) sites (the Grand Teton site (WY94) was excluded into trend analysis since it start to operate in 2011), (b) mean total N concentration ( $NH_4+NO_3$ ) in snow pack measured at Rocky Mountain Regional snow pack Chemistry (RMRSC) network sites within the GYA

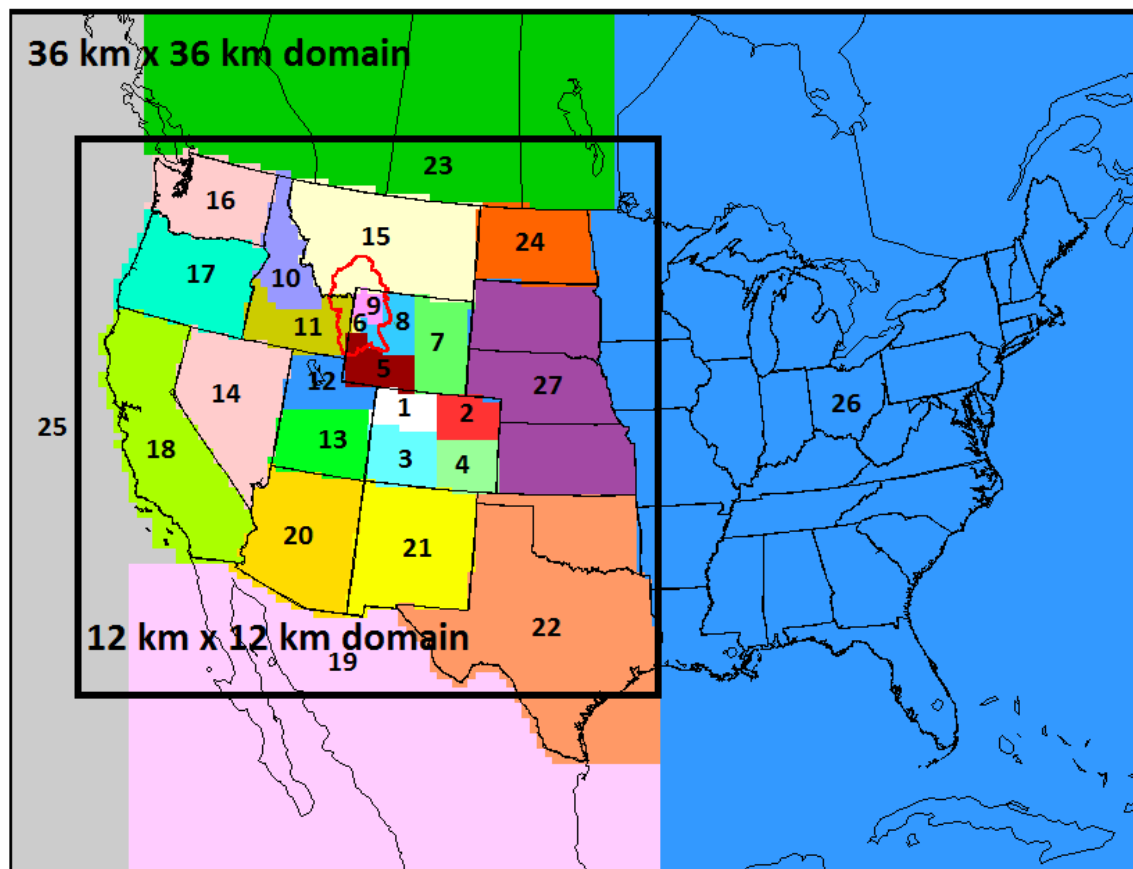

Figure S2. Source region partition for CAMx PSAT simulation in this study (also see Table 2 for detail region definition).

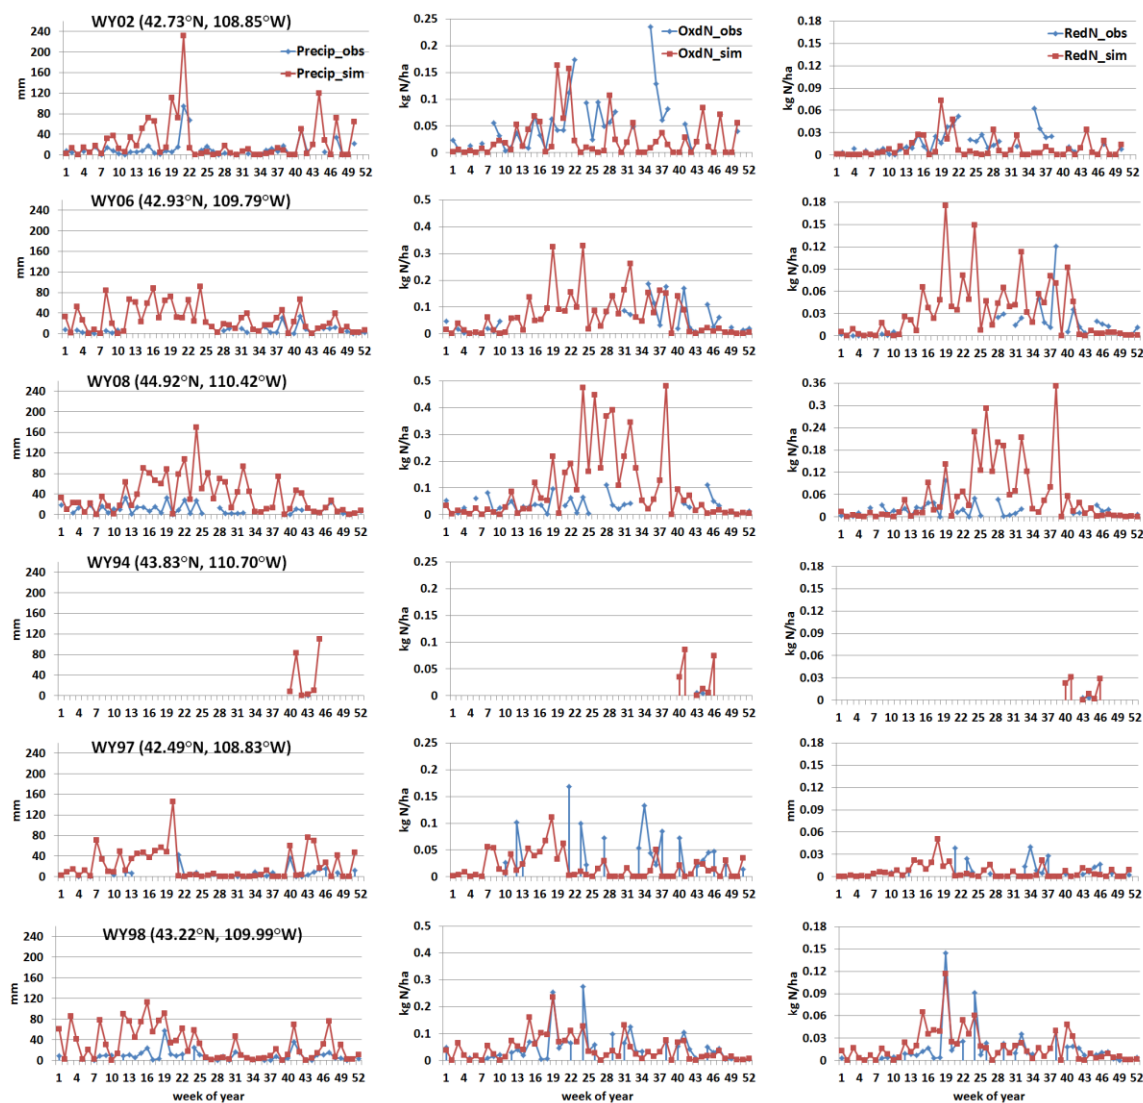

Figure S3. Time series comparison of measured (red lines) precipitation (left panels), wet deposition for oxidized nitrogen (middle panels) as well as wet deposition for reduced nitrogen with corresponding model values (blue lines) on the 6 NTN sites over GYA in 2011. The Grand Teton site (WY94) began operation in September 2011. Due to the incomplete time series these data were excluded from the model evaluation.

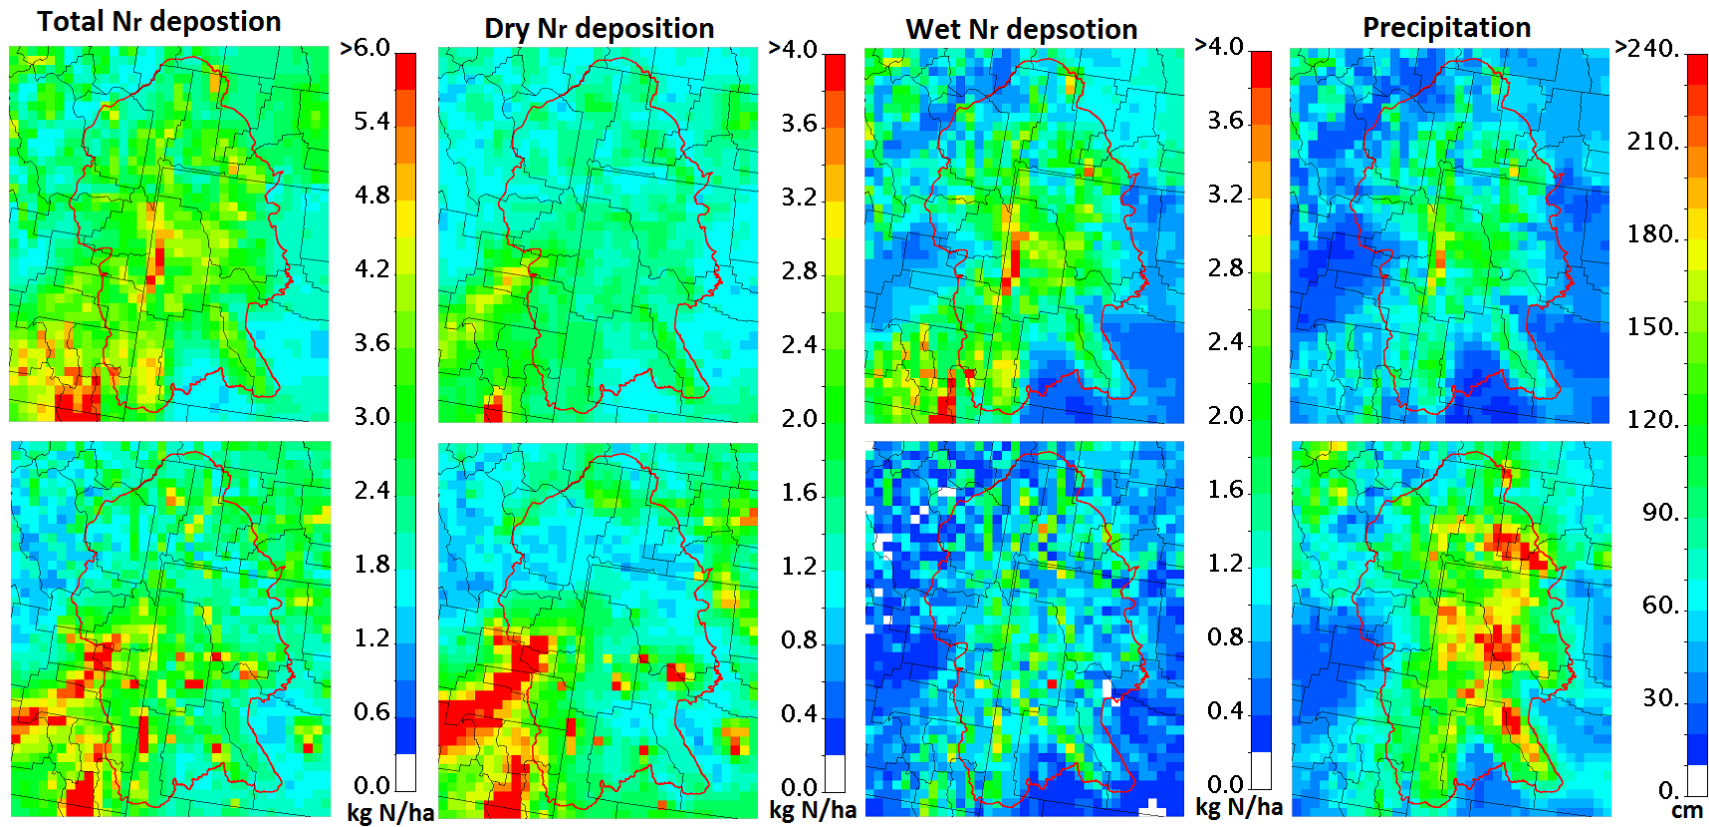

Figure S4. Spatial pattern comparison of annual total, dry, and wet deposition, as well as precipitation from the NADP Total Deposition Map (TDEP, above panel) and corresponding CAMx/WRF simulation results (lower panel) over the GYA area.

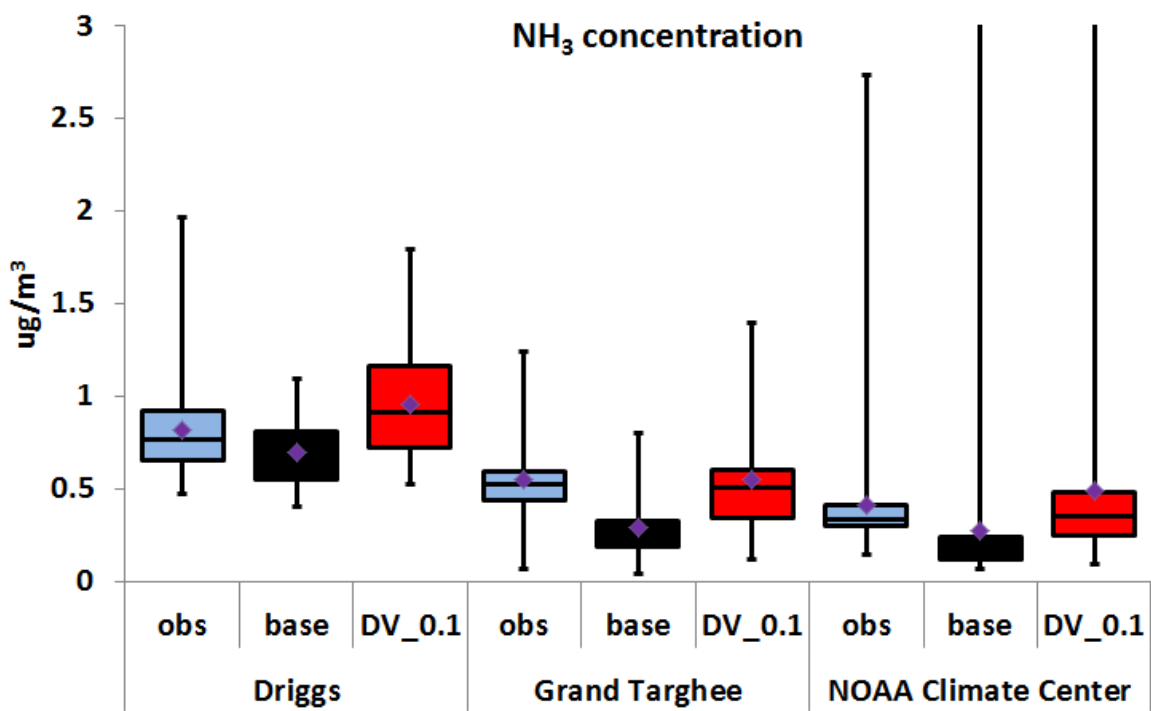

Figure S5. Sensitivity of the NH<sub>3</sub> dry deposition velocity to the simulated NH<sub>3</sub> concentrations at the three core sites during the GrandTRENDStudy in July–August 2011.

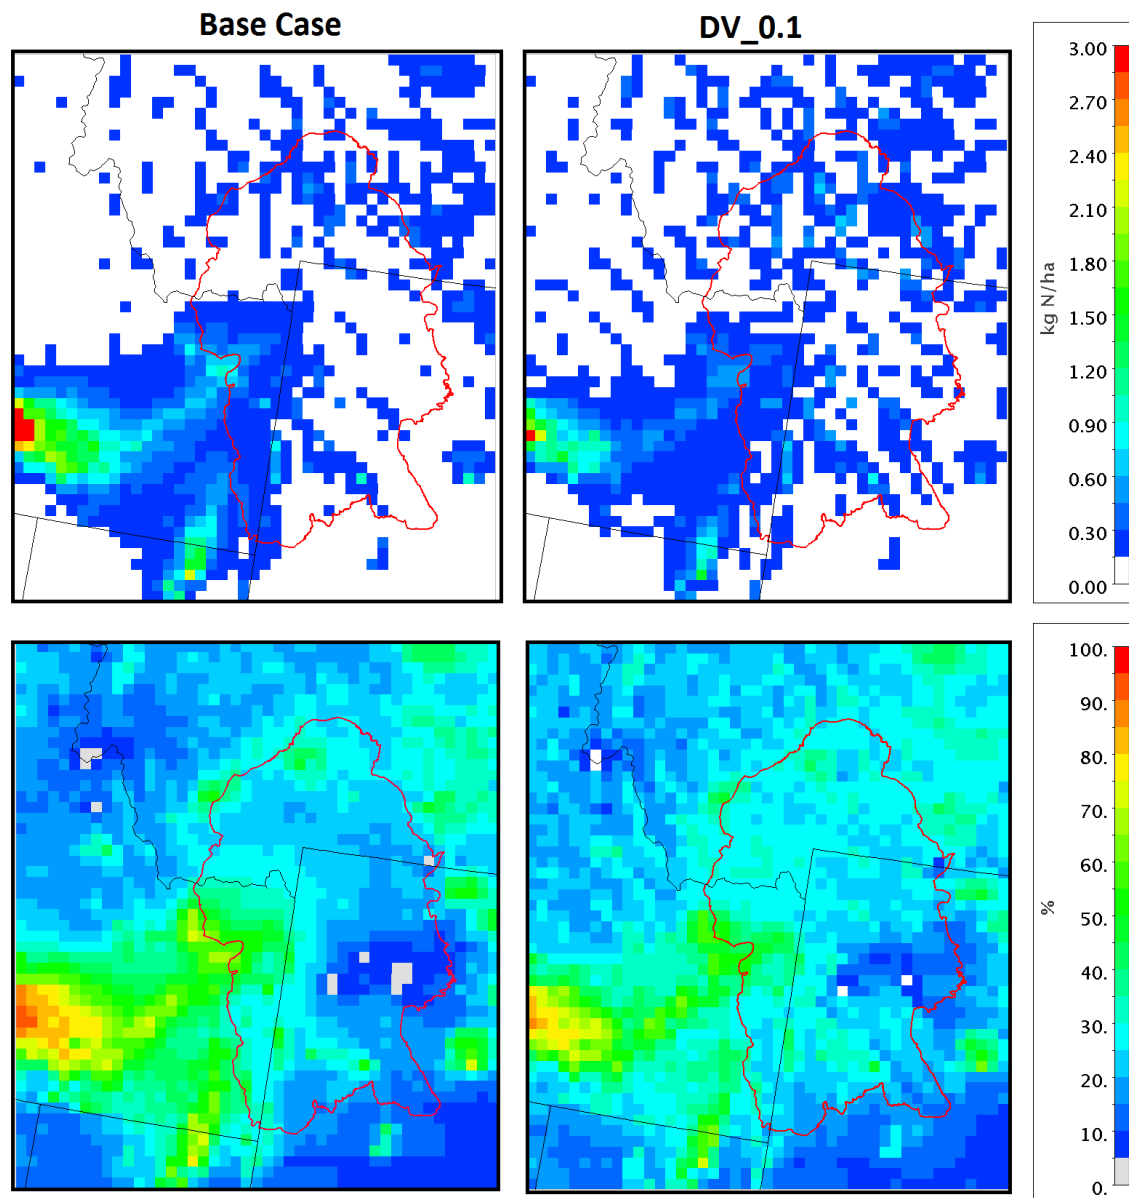

Figure S6. Change of spatial patterns of the simulated total  $N_r$  deposition (top panel) as well as contributions from agricultural emissions sector to  $N_r$  deposition budget (bottom panel) over the GYA area during July–August 2011 due to the change of  $NH_3$  deposition velocity in CAMx.

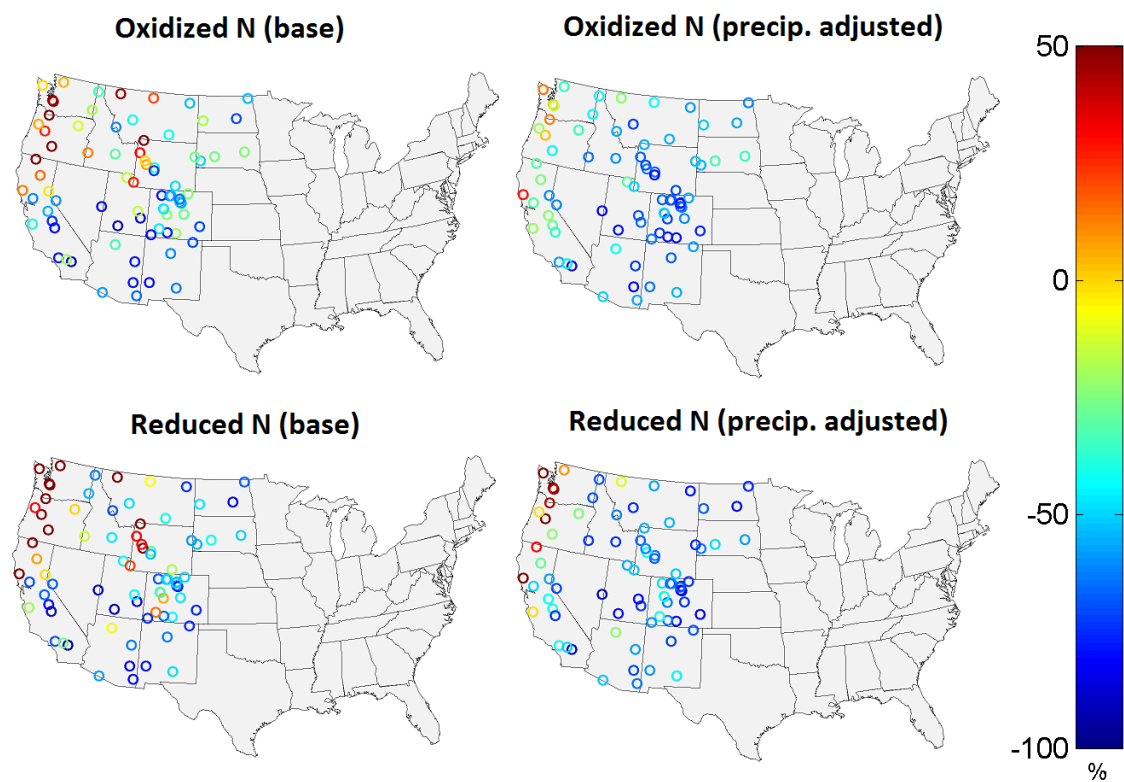

Figure S7. Change of model performance of CAMx wet oxidized and reduced nitrogen deposition simulation in terms of normalized mean bias at NADP NTN sites by implementing the precipitation adjustment technique followed by Appel et al. (2011).

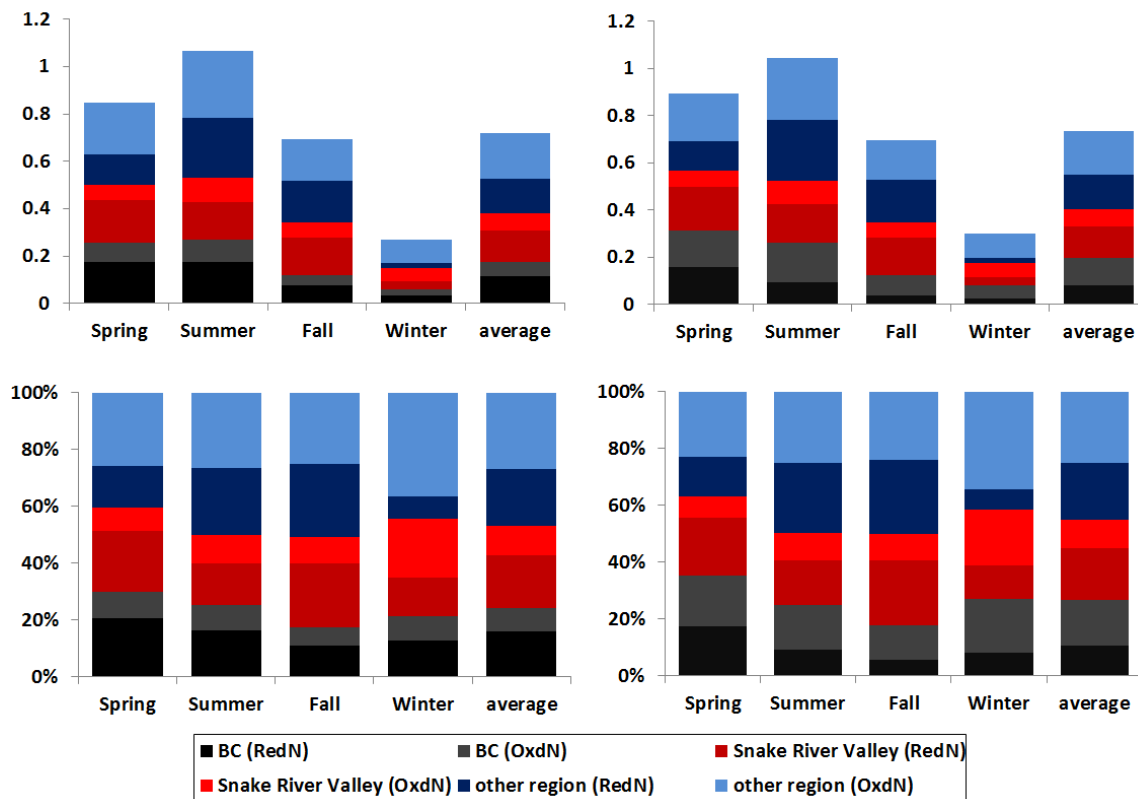

Figure S8. Sensitivity of MOZART (left) or GEOS-Chem (right) boundary conditions to average seasonal source apportionment results in 2011.



**Total Annual Precipitation Anomaly: 2011**  
Period ending 31 Dec 2011  
Base period: 1981-2010  
(Map created 12 Jun 2015)

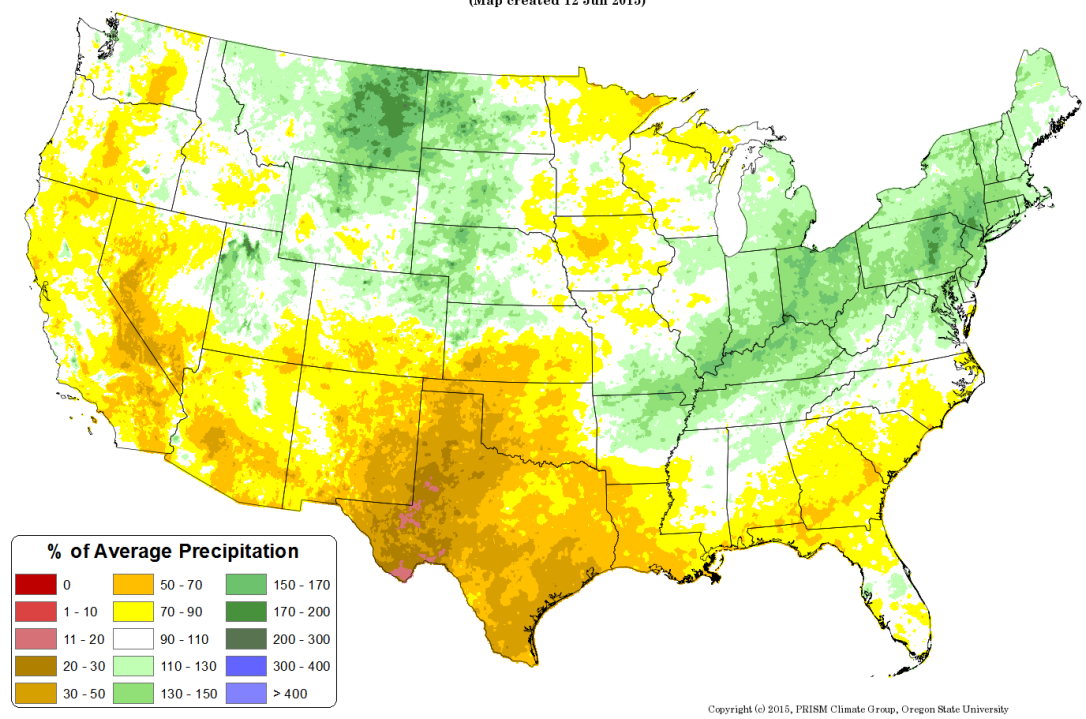

**30-yr Normal Precipitation: Annual**  
Period: 1981-2010

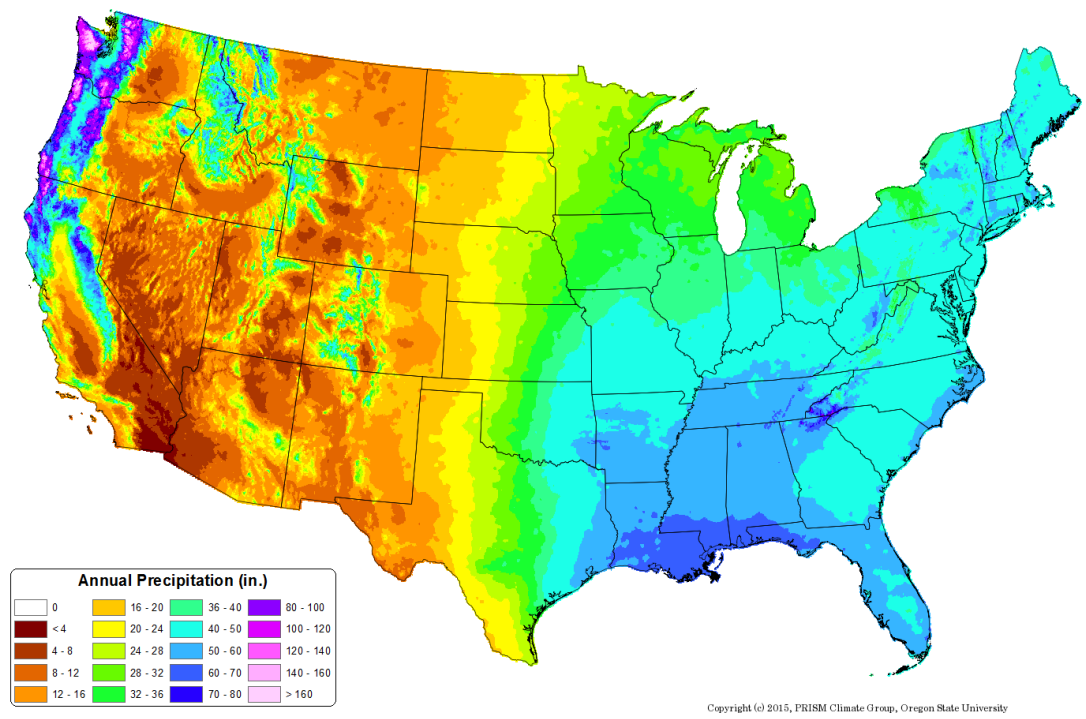

Figure S9. Total annual precipitation anomaly (in percentage) in the year 2011 compared with 30 years (1981-2010) normal annual precipitation from PRISM model

Table S1. Model configuration of WRF-SMOKE-CAMx simulation platform for reactive nitrogen source apportionment study

| <b>Meteorological Modeling: WRF-ARW version 3.5.1</b> |                                                                                                                                                                                                                                                                                        |
|-------------------------------------------------------|----------------------------------------------------------------------------------------------------------------------------------------------------------------------------------------------------------------------------------------------------------------------------------------|
| Domain definition                                     | Outer 36km domain (165x129 grid cells); Inner 12km domain (256x253 grid cell); Vertical layer: 37 layers from ground to 50mb with 16 layers within first 1km height                                                                                                                    |
| Physics options                                       | Microphysics: Thompson ice, snow and graupel scheme<br>Longwave radiation: RRTMG<br>Shortwave radiation: RRTMG<br>PBL scheme: YSU planetary boundary layer<br>Surface layer scheme: Monin-Obukhov<br>Cumulus parameterization: Kain-Fritsch scheme<br>Land-surface model: Unified NOAA |
| Data assimilation                                     | Analysis nudging for winds, temperature and mixing ratio above PBL with nudging coefficients $5 \times 10^{-4}$ , $3 \times 10^{-4}$ and $1 \times 10^{-5}$ respectively                                                                                                               |
| Initial condition                                     | 12km (Grid #218) North American Model (NAM)                                                                                                                                                                                                                                            |
| <b>Emission Modeling: SMOKE version 3.0</b>           |                                                                                                                                                                                                                                                                                        |
| Anthropogenic emission:                               | SMOKE version 3.0 with NEI2011v6<br>MOVES version 2010b for on-road mobile sources                                                                                                                                                                                                     |
| Biogenic emission:                                    | MEGAN version 2.1                                                                                                                                                                                                                                                                      |
| Dust emission:                                        | WRAP windblown dust model (WRAP-WBD)                                                                                                                                                                                                                                                   |
| Oil and gas emission:                                 | SMOKE with Independent Petroleum Association of the Mountain States (IPAMS)                                                                                                                                                                                                            |
| Lightning NO <sub>x</sub> :                           | ENVIRON generated based on NLCD lightning flash counts                                                                                                                                                                                                                                 |
| Sea salt:                                             | ENVIRON generated surf zone and open ocean PM emissions                                                                                                                                                                                                                                |
| <b>Photochemical Modeling: CAMx version 6.10</b>      |                                                                                                                                                                                                                                                                                        |
| Domain definition                                     | Outer 36km domain (148x112 grid cells); Inner 12km domain (227x230 grid cell); Vertical layer: 25 layer with layer 1 ~24m and model top ~ 19km MSL                                                                                                                                     |
| Gas phase chemistry:                                  | CB6r2                                                                                                                                                                                                                                                                                  |
| Deposition scheme:                                    | Zhang et al. (2003) <sup>1</sup> dry deposition scheme<br>CAMx-specific formulation for wet deposition                                                                                                                                                                                 |
| Aerosol module:                                       | CF scheme for aerosol size distribution                                                                                                                                                                                                                                                |
| Numeric options:                                      | Gas phase chemistry solver: Euler Backward Iterative (EBI)<br>Vertical advection scheme: Implicit scheme w/ vertical velocity update<br>Horizontal advection scheme: Piecewise Parabolic Method (PPM)                                                                                  |
| Photolysis rate:                                      | Day-specific ozone column data based on TOMS data measured by OMI                                                                                                                                                                                                                      |
| Boundary condition                                    | MOZART global chemistry model (GCM) version 4.6                                                                                                                                                                                                                                        |
| Initial condition                                     | Fresh start with 15 days spin-up time                                                                                                                                                                                                                                                  |

<sup>1</sup>Zhang, L., J.R. Brook, and R.Vet, (2003). A revised parameterization for gaseous dry deposition in air-quality models, Atmospheric Chemistry and Physics, 3, 2067-2082, doi:10.5194/acp-3-2067-2003.

Table S2. Summary of 27 tagged regions in CAMx PSAT of this study as well as their corresponding grid counts (36-km) and annual emissions for NH<sub>3</sub> and NO<sub>x</sub>

| Tagged region                 | Grid counts (36-km domain) | Total emission for nitrogen species (tons/yr) |     |       |         |         |                 |        |        |         |         |
|-------------------------------|----------------------------|-----------------------------------------------|-----|-------|---------|---------|-----------------|--------|--------|---------|---------|
|                               |                            | NH <sub>3</sub>                               |     |       |         |         | NO <sub>x</sub> |        |        |         |         |
|                               |                            | AG                                            | OG  | fire  | Other   | total   | AG              | OG     | fire   | Other   | total   |
| 1. NW Colorado (Southwest)    | 42                         | 4,900                                         | 0   | 55    | 418     | 5,373   | 0               | 12,046 | 564    | 54,827  | 67,437  |
| 2. NE Colorado (Southwest)    | 46                         | 37,041                                        | 0   | 415   | 3,157   | 40,613  | 0               | 16,002 | 749    | 72,830  | 89,581  |
| 3. SE Colorado (Southwest)    | 54                         | 20,281                                        | 0   | 227   | 1,728   | 22,237  | 0               | 20,869 | 976    | 94,980  | 116,825 |
| 4. SW Colorado (Southwest)    | 66                         | 6,672                                         | 0   | 75    | 569     | 7,315   | 0               | 5,504  | 258    | 25,051  | 30,812  |
| 5. Upper Green River, WY      | 49                         | 2,358                                         | 0   | 525   | 110     | 2,993   | 0               | 11,412 | 3,016  | 43,523  | 57,952  |
| 6. Jackson, WY                | 2                          | 2,375                                         | 0   | 529   | 111     | 3,015   | 0               | 477    | 126    | 1,817   | 2,420   |
| 1. Eastern Wyoming (Other WY) | 87                         | 7,298                                         | 0   | 1,625 | 342     | 9,265   | 0               | 3,013  | 796    | 11,490  | 15,299  |
| 2. Western Wyoming (Other WY) | 40                         | 18,046                                        | 0   | 4,018 | 845     | 22,910  | 0               | 10,925 | 2,887  | 41,662  | 55,474  |
| 3. Yellowstone (Other WY)     | 15                         | 1,511                                         | 0   | 336   | 71      | 1,918   | 0               | 761    | 201    | 2,902   | 3,864   |
| 4. Northern Idaho (Northwest) | 83                         | 16,887                                        | 0   | 2,193 | 910     | 19,991  | 0               | 669    | 6,906  | 47,036  | 54,612  |
| 5. Snake River Valley, ID     | 89                         | 43,696                                        | 0   | 5,674 | 2,356   | 51,726  | 0               | 682    | 7,030  | 47,882  | 55,594  |
| 6. Northern Utah              | 65                         | 12,946                                        | 0   | 69    | 2,163   | 15,178  | 0               | 10,235 | 200    | 92,312  | 102,747 |
| 7. Southern Utah (Southwest)  | 102                        | 10,083                                        | 0   | 54    | 1,685   | 11,822  | 0               | 8,907  | 174    | 80,338  | 89,419  |
| 8. Nevada                     | 219                        | 5,569                                         | 0   | 825   | 2,533   | 8,926   | 0               | 189    | 2,725  | 107,900 | 110,814 |
| 9. Montana                    | 308                        | 54,343                                        | 0   | 7,531 | 1,313   | 63,187  | 0               | 13,806 | 11,510 | 153,220 | 178,537 |
| 10. Washington (Northwest)    | 156                        | 44,118                                        | 3   | 825   | 7,400   | 52,345  | 0               | 467    | 2,458  | 268,831 | 271,757 |
| 11. Oregon (Northwest)        | 203                        | 43,626                                        | 0   | 8,858 | 5,164   | 57,649  | 0               | 925    | 28,231 | 146,062 | 175,218 |
| 12. California                | 362                        | 203,204                                       | 155 | 3,056 | 111,240 | 317,655 | 0               | 8,806  | 9,457  | 669,421 | 687,684 |

|                                                    |        |         |    |        |        |                  |   |         |        |           |                   |
|----------------------------------------------------|--------|---------|----|--------|--------|------------------|---|---------|--------|-----------|-------------------|
| <b>13. Mexico (Non-US)</b>                         | 1,969  |         |    |        |        | 246,344          |   |         |        |           | 782,600           |
| <b>14. New Mexico (Southwest)</b>                  | 247    | 35,327  | 0  | 4,374  | 2,673  | 42,374           | 0 | 71,863  | 15,197 | 170,550   | 257,609           |
| <b>15. Arizona (Southwest)</b>                     | 236    | 33,247  | 0  | 9,041  | 8,520  | 50,808           | 0 | 1,489   | 26,817 | 250,201   | 278,506           |
| <b>16. Texas&amp;Oklahoma (Southwest)</b>          | 800    | 364,835 | 44 | 24,481 | 39,179 | 428,539          | 0 | 410,736 | 35,635 | 1,450,095 | 1,896,465         |
| <b>17. Canada (Non-US)</b>                         | 1,398  |         |    |        |        | 421,830          |   |         |        |           | 934,900           |
| <b>18. North Dakota (Eastern US+Great Plains)</b>  | 152    | 93,163  | 0  | 952    | 6,995  | 101,110          | 0 | 8,408   | 1,407  | 171,869   | 181,683           |
| <b>19. Pacific (Non-US)</b>                        | 1,820  |         |    |        |        | 292              |   |         |        |           | 251,698           |
| <b>20. Far East U.S. (Eastern US+Great Plains)</b> | 7,500  |         |    |        |        | 2,627,200        |   |         |        |           | 9,296,000         |
| <b>21. SD_KS_NE (Eastern US+Great Plains)</b>      | 466    | 480,670 | 4  | 6,245  | 9,439  | 496,359          | 0 | 96,945  | 25,572 | 666,950   | 789,467           |
| <b>Total:</b>                                      | 16,576 |         |    |        |        | <b>5,128,972</b> |   |         |        |           | <b>16,834,975</b> |

Note: <sup>1</sup>agriculture activities emission; <sup>2</sup>oil and gas activities emission; <sup>3</sup>wildfires and prescribed fires emission; <sup>4</sup>the remaining emission sectors mainly form anthropogenic emission, BVOC emission and lighting NO<sub>x</sub>

Table S3. Detail source attribution results of 27 tagged source regions as well as agriculture (AG), oil and gas (OG), wildfires and prescribed fires (fire) and remaining emission source sectors (Other) as well as boundary conditions (BC) to average  $N_r$  deposition at each season in 2011

| Source Area       | Time   | Total N<br>(g N ha <sup>-1</sup> season <sup>-1</sup> ) |     |      |       |    | Dry N<br>(percentage) |     |      |       |    | Reduced N<br>(percentage) |    |      |       |    |
|-------------------|--------|---------------------------------------------------------|-----|------|-------|----|-----------------------|-----|------|-------|----|---------------------------|----|------|-------|----|
|                   |        | AG                                                      | OG  | fire | Other | BC | AG                    | OG  | fire | Other | BC | AG                        | OG | fire | Other | BC |
| NW Colorado       | Winter | 0.0                                                     | 0.0 | 0.0  | 0.0   |    | 15%                   | 53% | 85%  | 71%   |    | 100%                      | 0% | 1%   | 5%    |    |
| NW Colorado       | Spring | 0.1                                                     | 0.3 | 0.0  | 0.4   |    | 26%                   | 63% | 51%  | 66%   |    | 100%                      | 0% | 2%   | 1%    |    |
| NW Colorado       | Summer | 0.0                                                     | 0.1 | 0.0  | 0.1   |    | 19%                   | 60% | 61%  | 51%   |    | 100%                      | 0% | 3%   | 2%    |    |
| NW Colorado       | Fall   | 0.1                                                     | 0.3 | 0.0  | 0.5   |    | 29%                   | 63% | 57%  | 63%   |    | 100%                      | 0% | 2%   | 2%    |    |
| NE Colorado       | Winter | 0.0                                                     | 0.0 | 0.0  | 0.0   |    | 93%                   | 98% | 98%  | 88%   |    | 100%                      | 0% | 1%   | 7%    |    |
| NE Colorado       | Spring | 0.2                                                     | 0.1 | 0.0  | 0.4   |    | 20%                   | 67% | 51%  | 60%   |    | 100%                      | 0% | 2%   | 2%    |    |
| NE Colorado       | Summer | 0.0                                                     | 0.0 | 0.0  | 0.1   |    | 33%                   | 60% | 61%  | 59%   |    | 100%                      | 0% | 3%   | 2%    |    |
| NE Colorado       | Fall   | 0.6                                                     | 0.2 | 0.0  | 1.1   |    | 42%                   | 73% | 57%  | 67%   |    | 100%                      | 0% | 2%   | 4%    |    |
| SE Colorado       | Winter | 0.0                                                     | 0.0 | 0.0  | 0.0   |    | 80%                   | 98% | 98%  | 85%   |    | 100%                      | 0% | 2%   | 8%    |    |
| SE Colorado       | Spring | 0.0                                                     | 0.0 | 0.0  | 0.1   |    | 9%                    | 45% | 51%  | 48%   |    | 100%                      | 0% | 2%   | 2%    |    |
| SE Colorado       | Summer | 0.0                                                     | 0.0 | 0.0  | 0.1   |    | 31%                   | 55% | 61%  | 49%   |    | 100%                      | 0% | 3%   | 2%    |    |
| SE Colorado       | Fall   | 0.2                                                     | 0.0 | 0.0  | 0.4   |    | 32%                   | 64% | 57%  | 62%   |    | 100%                      | 0% | 2%   | 4%    |    |
| SW Colorado       | Winter | 0.0                                                     | 0.1 | 0.0  | 0.0   |    | 27%                   | 78% | 85%  | 61%   |    | 100%                      | 0% | 1%   | 4%    |    |
| SW Colorado       | Spring | 0.1                                                     | 0.2 | 0.0  | 0.2   |    | 20%                   | 63% | 51%  | 62%   |    | 100%                      | 0% | 2%   | 3%    |    |
| SW Colorado       | Summer | 0.1                                                     | 0.2 | 0.0  | 0.3   |    | 10%                   | 43% | 61%  | 39%   |    | 100%                      | 0% | 3%   | 3%    |    |
| SW Colorado       | Fall   | 0.2                                                     | 0.3 | 0.0  | 0.3   |    | 25%                   | 62% | 57%  | 54%   |    | 100%                      | 0% | 2%   | 1%    |    |
| Upper Green River | Winter | 1.2                                                     | 1.0 | 2.3  | 0.7   |    | 48%                   | 79% | 82%  | 61%   |    | 100%                      | 0% | 0%   | 4%    |    |
| Upper Green River | Spring | 12.0                                                    | 3.5 | 8.8  | 1.9   |    | 32%                   | 54% | 51%  | 41%   |    | 100%                      | 0% | 1%   | 5%    |    |
| Upper Green River | Summer | 8.3                                                     | 3.2 | 8.2  | 4.8   |    | 54%                   | 77% | 69%  | 78%   |    | 100%                      | 0% | 1%   | 2%    |    |
| Upper Green River | Fall   | 6.9                                                     | 2.3 | 6.4  | 1.9   |    | 62%                   | 84% | 76%  | 100%  |    | 100%                      | 0% | 6%   | 5%    |    |
| Jackson           | Winter | 0.6                                                     | 0.0 | 0.1  | 4.0   |    | 64%                   | 78% | 73%  | 94%   |    | 100%                      | 1% | 10%  | 9%    |    |

|                    |        |       |     |      |      |     |     |     |     |      |     |     |    |
|--------------------|--------|-------|-----|------|------|-----|-----|-----|-----|------|-----|-----|----|
| Jackson            | Spring | 4.5   | 0.0 | 1.2  | 4.7  | 60% | 96% | 44% | 78% | 100% | 0%  | 0%  | 3% |
| Jackson            | Summer | 3.1   | 0.0 | 0.4  | 5.8  | 81% | 60% | 33% | 89% | 100% | 43% | 1%  | 8% |
| Jackson            | Fall   | 3.6   | 0.0 | 3.5  | 4.5  | 85% | 72% | 89% | 94% | 100% | 1%  | 72% | 5% |
| Eastern Wyoming    | Winter | 0.0   | 0.1 | 0.2  | 0.0  | 79% | 97% | 97% | 94% | 100% | 0%  | 67% | 0% |
| Eastern Wyoming    | Spring | 0.5   | 0.4 | 1.1  | 1.1  | 33% | 68% | 53% | 83% | 100% | 0%  | 1%  | 1% |
| Eastern Wyoming    | Summer | 0.1   | 0.1 | 0.3  | 0.0  | 41% | 85% | 79% | 46% | 100% | 0%  | 84% | 1% |
| Eastern Wyoming    | Fall   | 1.3   | 0.7 | 3.4  | 0.0  | 70% | 92% | 91% | 10% | 100% | 0%  | 63% | 0% |
| Western Wyoming    | Winter | 1.2   | 0.7 | 0.6  | 0.1  | 70% | 84% | 82% | 99% | 100% | 0%  | 69% | 0% |
| Western Wyoming    | Spring | 10.8  | 1.9 | 2.6  | 0.1  | 48% | 61% | 51% | 68% | 100% | 0%  | 1%  | 2% |
| Western Wyoming    | Summer | 5.3   | 1.6 | 46.9 | 0.5  | 61% | 83% | 89% | 81% | 100% | 0%  | 90% | 2% |
| Western Wyoming    | Fall   | 6.6   | 1.5 | 9.9  | 0.0  | 73% | 87% | 85% | 90% | 100% | 0%  | 71% | 4% |
| Yellowstone        | Winter | 0.1   | 0.0 | 0.2  | 2.3  | 82% | 92% | 70% | 81% | 100% | 0%  | 55% | 5% |
| Yellowstone        | Spring | 0.6   | 0.0 | 0.9  | 2.2  | 68% | 75% | 53% | 65% | 100% | 0%  | 1%  | 1% |
| Yellowstone        | Summer | 0.4   | 0.0 | 25.7 | 62.9 | 85% | 90% | 79% | 75% | 100% | 0%  | 98% | 1% |
| Yellowstone        | Fall   | 0.5   | 0.0 | 13.9 | 43.6 | 86% | 93% | 94% | 94% | 100% | 0%  | 97% | 3% |
| Northern Idaho     | Winter | 0.3   | 0.0 | 1.6  | 0.8  | 40% | 86% | 55% | 90% | 100% | 0%  | 5%  | 2% |
| Northern Idaho     | Spring | 1.7   | 0.0 | 3.6  | 0.0  | 45% | 77% | 57% | 88% | 100% | 0%  | 5%  | 3% |
| Northern Idaho     | Summer | 0.8   | 0.0 | 1.9  | 1.8  | 57% | 60% | 56% | 82% | 100% | 0%  | 12% | 2% |
| Northern Idaho     | Fall   | 2.2   | 0.0 | 9.4  | 15.0 | 51% | 78% | 55% | 46% | 100% | 0%  | 68% | 4% |
| Snake River Valley | Winter | 45.7  | 1.5 | 11.6 | 61.1 | 59% | 70% | 69% | 73% | 100% | 0%  | 23% | 7% |
| Snake River Valley | Spring | 259.5 | 1.7 | 18.0 | 62.0 | 65% | 52% | 54% | 57% | 100% | 0%  | 18% | 2% |
| Snake River Valley | Summer | 230.6 | 2.3 | 84.7 | 43.1 | 76% | 77% | 68% | 99% | 100% | 0%  | 14% | 9% |
| Snake River Valley | Fall   | 259.3 | 1.8 | 66.3 | 22.0 | 82% | 79% | 86% | 63% | 100% | 0%  | 28% | 1% |
| Northern Utah      | Winter | 2.8   | 0.3 | 3.3  | 17.2 | 40% | 73% | 74% | 73% | 100% | 0%  | 17% | 4% |
| Northern Utah      | Spring | 14.7  | 1.1 | 6.0  | 31.8 | 25% | 48% | 41% | 45% | 100% | 0%  | 5%  | 4% |
| Northern Utah      | Summer | 16.8  | 1.0 | 5.0  | 42.9 | 51% | 70% | 66% | 70% | 100% | 0%  | 8%  | 3% |
| Northern Utah      | Fall   | 12.4  | 0.8 | 3.6  | 23.9 | 49% | 73% | 63% | 71% | 100% | 0%  | 6%  | 3% |
| Southern Utah      | Winter | 0.6   | 0.1 | 3.7  | 2.4  | 38% | 74% | 85% | 77% | 100% | 0%  | 1%  | 1% |

|               |        |      |     |      |      |     |     |     |      |      |    |     |    |
|---------------|--------|------|-----|------|------|-----|-----|-----|------|------|----|-----|----|
| Southern Utah | Spring | 3.6  | 0.2 | 4.9  | 3.5  | 14% | 51% | 51% | 44%  | 100% | 0% | 2%  | 1% |
| Southern Utah | Summer | 4.6  | 0.2 | 9.2  | 9.5  | 47% | 63% | 61% | 78%  | 100% | 0% | 2%  | 0% |
| Southern Utah | Fall   | 4.6  | 0.2 | 7.5  | 6.0  | 36% | 69% | 57% | 76%  | 100% | 0% | 2%  | 0% |
| Nevada        | Winter | 0.5  | 0.0 | 1.4  | 5.1  | 26% | 54% | 70% | 65%  | 100% | 0% | 2%  | 3% |
| Nevada        | Spring | 3.5  | 0.1 | 2.5  | 12.9 | 18% | 29% | 37% | 31%  | 100% | 0% | 2%  | 3% |
| Nevada        | Summer | 4.4  | 0.1 | 4.6  | 32.3 | 38% | 61% | 56% | 67%  | 100% | 0% | 7%  | 3% |
| Nevada        | Fall   | 1.8  | 0.0 | 2.3  | 8.5  | 43% | 64% | 53% | 64%  | 100% | 0% | 10% | 4% |
| Montana       | Winter | 0.6  | 0.2 | 0.8  | 2.2  | 47% | 76% | 82% | 81%  | 100% | 0% | 4%  | 8% |
| Montana       | Spring | 7.0  | 0.7 | 4.0  | 3.9  | 34% | 61% | 54% | 69%  | 100% | 0% | 1%  | 5% |
| Montana       | Summer | 0.8  | 0.1 | 0.9  | 1.6  | 38% | 61% | 55% | 75%  | 100% | 0% | 6%  | 4% |
| Montana       | Fall   | 4.3  | 0.4 | 13.3 | 3.7  | 57% | 82% | 56% | 61%  | 100% | 0% | 68% | 3% |
| Washington    | Winter | 0.7  | 0.0 | 1.6  | 7.3  | 49% | 80% | 55% | 78%  | 100% | 1% | 5%  | 6% |
| Washington    | Spring | 3.7  | 0.0 | 4.4  | 7.3  | 50% | 67% | 61% | 75%  | 100% | 1% | 4%  | 4% |
| Washington    | Summer | 1.9  | 0.0 | 2.0  | 5.5  | 41% | 65% | 56% | 65%  | 100% | 7% | 12% | 4% |
| Washington    | Fall   | 2.7  | 0.0 | 7.7  | 0.5  | 48% | 71% | 70% | 98%  | 100% | 1% | 11% | 0% |
| Oregon        | Winter | 1.5  | 0.1 | 3.1  | 5.2  | 34% | 66% | 55% | 54%  | 100% | 0% | 5%  | 2% |
| Oregon        | Spring | 10.4 | 0.1 | 8.2  | 11.0 | 40% | 44% | 61% | 43%  | 100% | 0% | 4%  | 3% |
| Oregon        | Summer | 10.8 | 0.1 | 3.8  | 17.0 | 54% | 73% | 56% | 71%  | 100% | 0% | 12% | 0% |
| Oregon        | Fall   | 6.2  | 0.1 | 17.4 | 2.7  | 54% | 70% | 58% | 99%  | 100% | 0% | 28% | 1% |
| California    | Winter | 1.2  | 0.2 | 4.9  | 13.2 | 23% | 57% | 67% | 56%  | 100% | 2% | 6%  | 2% |
| California    | Spring | 21.5 | 0.5 | 12.0 | 45.2 | 12% | 31% | 47% | 26%  | 100% | 3% | 7%  | 2% |
| California    | Summer | 29.3 | 0.6 | 10.6 | 56.0 | 35% | 64% | 57% | 60%  | 100% | 4% | 18% | 3% |
| California    | Fall   | 7.0  | 0.2 | 5.1  | 18.5 | 40% | 61% | 51% | 56%  | 100% | 2% | 18% | 2% |
| Mexico        | Winter | 0.0  | 0.0 | 0.3  | 0.0  | 78% | 83% | 76% | 100% | 1%   | 1% | 15% | 3% |
| Mexico        | Spring | 0.0  | 0.0 | 0.6  | 1.1  | 96% | 57% | 61% | 33%  | 0%   | 0% | 4%  | 1% |
| Mexico        | Summer | 0.0  | 0.0 | 0.6  | 20.2 | 60% | 69% | 54% | 52%  | 43%  | 0% | 1%  | 5% |
| Mexico        | Fall   | 0.0  | 0.0 | 0.7  | 3.3  | 72% | 58% | 75% | 41%  | 1%   | 0% | 36% | 6% |
| New Mexico    | Winter | 0.0  | 0.1 | 0.1  | 0.3  | 60% | 91% | 85% | 89%  | 100% | 0% | 1%  | 1% |

|                  |        |     |     |     |     |     |      |      |      |      |     |     |    |
|------------------|--------|-----|-----|-----|-----|-----|------|------|------|------|-----|-----|----|
| New Mexico       | Spring | 0.1 | 0.1 | 0.1 | 0.5 | 17% | 61%  | 51%  | 70%  | 100% | 0%  | 2%  | 5% |
| New Mexico       | Summer | 0.8 | 0.5 | 0.2 | 3.4 | 21% | 41%  | 61%  | 40%  | 100% | 0%  | 3%  | 8% |
| New Mexico       | Fall   | 0.6 | 0.4 | 0.1 | 1.5 | 24% | 60%  | 57%  | 56%  | 100% | 0%  | 2%  | 4% |
| Arizona          | Winter | 0.1 | 0.0 | 1.9 | 0.2 | 41% | 82%  | 78%  | 89%  | 100% | 0%  | 1%  | 3% |
| Arizona          | Spring | 1.1 | 0.1 | 3.7 | 0.3 | 13% | 50%  | 48%  | 57%  | 100% | 0%  | 2%  | 1% |
| Arizona          | Summer | 3.0 | 0.1 | 7.3 | 5.8 | 36% | 59%  | 61%  | 60%  | 100% | 0%  | 3%  | 2% |
| Arizona          | Fall   | 2.4 | 0.1 | 6.0 | 3.2 | 29% | 66%  | 57%  | 70%  | 100% | 0%  | 2%  | 2% |
| Texas & Oklahoma | Winter | 0.0 | 0.0 | 0.0 | 0.0 | 71% | 97%  | 95%  | 51%  | 100% | 0%  | 1%  | 6% |
| Texas & Oklahoma | Spring | 0.4 | 0.2 | 0.1 | 0.7 | 11% | 55%  | 51%  | 51%  | 100% | 0%  | 2%  | 7% |
| Texas & Oklahoma | Summer | 2.2 | 1.0 | 0.2 | 5.2 | 28% | 52%  | 61%  | 52%  | 100% | 0%  | 3%  | 8% |
| Texas & Oklahoma | Fall   | 2.1 | 0.5 | 0.1 | 1.7 | 25% | 56%  | 57%  | 50%  | 100% | 0%  | 2%  | 2% |
| Canada           | Winter | 0.0 | 0.0 | 7.5 | 2.8 | 78% | 78%  | 73%  | 81%  | 1%   | 1%  | 9%  | 2% |
| Canada           | Spring | 0.0 | 0.0 | 6.9 | 1.9 | 96% | 96%  | 67%  | 100% | 0%   | 0%  | 4%  | 2% |
| Canada           | Summer | 0.0 | 0.0 | 4.6 | 0.0 | 60% | 60%  | 63%  | 40%  | 43%  | 43% | 2%  | 4% |
| Canada           | Fall   | 0.0 | 0.0 | 9.3 | 1.8 | 72% | 72%  | 75%  | 64%  | 1%   | 1%  | 40% | 2% |
| North Dakota     | Winter | 0.0 | 0.0 | 0.0 | 0.0 | 85% | 94%  | 90%  | 93%  | 100% | 0%  | 5%  | 6% |
| North Dakota     | Spring | 0.9 | 0.1 | 0.9 | 1.2 | 10% | 52%  | 35%  | 54%  | 100% | 0%  | 6%  | 2% |
| North Dakota     | Summer | 0.0 | 0.0 | 0.0 | 0.0 | 40% | 81%  | 75%  | 93%  | 100% | 0%  | 1%  | 4% |
| North Dakota     | Fall   | 0.4 | 0.0 | 0.1 | 0.1 | 68% | 86%  | 60%  | 100% | 100% | 0%  | 15% | 0% |
| Pacific          | Winter | 0.0 | 0.0 | 1.7 | 1.8 | 20% | 78%  | 73%  | 40%  | 99%  | 1%  | 0%  | 0% |
| Pacific          | Spring | 0.0 | 0.0 | 1.8 | 3.2 | 14% | 96%  | 61%  | 47%  | 100% | 0%  | 0%  | 0% |
| Pacific          | Summer | 0.0 | 0.0 | 1.5 | 0.1 | 40% | 60%  | 68%  | 99%  | 100% | 43% | 0%  | 0% |
| Pacific          | Fall   | 0.0 | 0.0 | 2.2 | 1.1 | 34% | 72%  | 75%  | 49%  | 100% | 1%  | 2%  | 0% |
| Far East US      | Winter | 0.0 | 0.0 | 0.0 | 0.0 | 99% | 100% | 100% | 100% | 100% | 0%  | 3%  | 0% |
| Far East US      | Spring | 3.4 | 0.1 | 3.1 | 1.2 | 8%  | 55%  | 35%  | 87%  | 100% | 1%  | 6%  | 2% |
| Far East US      | Summer | 0.5 | 0.2 | 0.9 | 2.3 | 30% | 60%  | 46%  | 57%  | 100% | 0%  | 3%  | 6% |
| Far East US      | Fall   | 0.3 | 0.0 | 0.3 | 0.3 | 24% | 54%  | 55%  | 45%  | 100% | 0%  | 17% | 3% |
| SD_KS_NE         | Winter | 0.0 | 0.0 | 0.0 | 0.0 | 92% | 99%  | 95%  | 100% | 100% | 0%  | 5%  | 2% |



|          |        |     |     |     |       |     |     |     |     |      |    |     |       |
|----------|--------|-----|-----|-----|-------|-----|-----|-----|-----|------|----|-----|-------|
| SD_KS_NE | Spring | 2.0 | 0.1 | 1.4 | 1.2   | 12% | 55% | 35% | 61% | 100% | 0% | 3%  | 0%    |
| SD_KS_NE | Summer | 0.2 | 0.0 | 0.2 | 0.0   | 34% | 59% | 59% | 64% | 100% | 0% | 2%  | 0%    |
| SD_KS_NE | Fall   | 1.2 | 0.1 | 0.1 | 0.7   | 48% | 67% | 55% | 86% | 100% | 0% | 12% | 0%    |
| BC       | Winter |     |     |     | 55.0  |     |     |     | 50% |      |    |     | 58.4% |
| BC       | Spring |     |     |     | 235.4 |     |     |     | 21% |      |    |     | 67.8% |
| BC       | Summer |     |     |     | 246.3 |     |     |     | 38% |      |    |     | 64.1% |
| BC       | Fall   |     |     |     | 115.1 |     |     |     | 52% |      |    |     | 63.2% |

---

## Supplement File S1

**Regional evaluation of CAMx nitrogen deposition in 2011**

The Three-State Air Quality Study (3SAQS) performed photochemical grid modeling using the same modeling platform and input files as this study, but with the addition of a nested, 4-km domain centered over Colorado, Utah, and Wyoming (UNC and ENVIRON, 2014). The 3SAQS comprehensive model evaluation report (UNC and ENVIRON, 2015) compared the simulated Nr compound with regard to concentration and deposition against the routine measured data for all sites within the 12-km and 4-km domains. A subset of these results is reproduced in attached Table. With the exception of NH<sub>3</sub>, the 3SAQS simulation generally reproduced the spatial and temporal variations of the ambient nitrogen concentrations over the western United States with a fractional bias (FB) smaller than  $\pm 60\%$  (Boylan and Russell, 2006) (Table S3). However, there were important systematic biases. The oxidized nitrogen gases of NO<sub>2</sub> and HNO<sub>3</sub> were overestimated with FBs of 29% and 81%, respectively, while NH<sub>3</sub> was underestimated by -101%. The CAMx model had different systematic biases for the simulated PNO<sub>3</sub> and PNH<sub>4</sub> concentration in the different networks. The PNO<sub>3</sub> were underestimated at CASTNet and CSN sites while overestimated those at IMPROVE sites. For PNH<sub>4</sub>, the simulation underestimated data at CASTNet sites while overestimated those at CSN sites. The measured PNH<sub>4</sub> at CASTNet and CSN suffered from a negative artifact due to volatilization (Yu et al., 2005) and an accurate model simulation should overestimate these measured concentrations. Note that the dry deposition value provided by CASTNet is not a direct flux measurement but rather the product of a measured concentration and an estimated dry deposition velocity derived from the Multilayer Model (MLM, Cooter and Schwede, 2000). Different deposition velocity algorithm used between MLM and regional CTM model such as CMAQ can impose uncertainties for dry deposition estimates (Schwede and Lear, 2014). Both oxidized and reduced N were underestimated by more than -50% in the wet deposition, with reduced N bias greater than oxidized N (-70% versus -58%, respectively). The biases in particulate compounds did not have any systematic patterns and varied by network and species.

**Reference:**

Boylan, J.W. and Russell, A.G. (2006). PM and light extinction model performance metrics, goals, and criteria for three-dimensional air quality models. *Atmospheric Environment*, 40(26), pp.4946-4959.

Cooter, E.J. and Schwede, D.B., (2000). Sensitivity of the National Oceanic and Atmospheric Administration multilayer model to instrument error and parameterization uncertainty. *Journal of Geophysical Research: Atmospheres*, 105(D5), pp.6695-6707.

Schwede, D. B., and Lear, G. G. (2014). A novel hybrid approach for estimating total deposition in the United States. *Atmospheric Environment*, 92, 207-220.

UNC-Chapel Hill and ENVIRON International Corporation (2014), *Three-State Air Quality Modeling Study (3SAQS) – Final modeling protocol: 2011 emissions & air quality modeling platform*, Available at :  
[http://vibe.cira.colostate.edu/wiki/Attachments/Modeling/3SAQS\\_2011\\_WRF\\_MPE\\_v8\\_draft\\_Aug04\\_2014.pdf](http://vibe.cira.colostate.edu/wiki/Attachments/Modeling/3SAQS_2011_WRF_MPE_v8_draft_Aug04_2014.pdf).

UNC-Chapel Hill and ENVIRON International Corporation (2015), *Three-State Air Quality Modeling Study (3SAQS) – Model performance evaluation (simulation year 2011)*, Available at:  
[http://vibe.cira.colostate.edu/wiki/Attachments/Modeling/3SAQS\\_Base11a\\_MPE\\_Final\\_18Jun2015.pdf](http://vibe.cira.colostate.edu/wiki/Attachments/Modeling/3SAQS_Base11a_MPE_Final_18Jun2015.pdf)

Table. Summary of CAMx model performance for nitrogen compound concentrations and deposition simulations at different network sites over the WRAP region, evaluated by 3SAQS study\*

| <b>Gaseous N<sub>r</sub> concentration evaluation</b>             |                      |                   |          |          |      |         |         |        |        |
|-------------------------------------------------------------------|----------------------|-------------------|----------|----------|------|---------|---------|--------|--------|
| Species                                                           | Network              | Domain resolution | Mean Obs | Mean Sim | R    | NMB (%) | NME (%) | FB (%) | FE (%) |
| NO <sub>2</sub> (ppb)                                             | AQS                  | 4km               | 9.6      | 13.7     | N.A. | 58      | 93      | 29     | 63     |
| NH <sub>3</sub> (ppb)                                             | AMoN                 | 4km               | 1.2      | 0.42     | 0.71 | -66     | 69      | -101   | 115    |
| <b>Particulate matter N<sub>r</sub> concentration evaluation</b>  |                      |                   |          |          |      |         |         |        |        |
| PNO <sub>3</sub> (ug m <sup>-3</sup> )                            | CASTNet <sup>1</sup> | 12km              | 0.51     | 0.46     | N.A. | -9      | 64      | -12    | 74     |
|                                                                   | CSN                  | 12km              | 1.63     | 1.27     | N.A. | -22     | 66      | -30    | 75     |
|                                                                   | IMPROVE              | 12km              | 0.34     | 0.44     | N.A. | 30      | 94      | 31     | 83     |
| PNH <sub>4</sub> (ug m <sup>-3</sup> )                            | CASTNet <sup>2</sup> | 12km              | 0.34     | 0.33     | N.A. | -4      | 43      | -7     | 41     |
|                                                                   | CSN                  | 12km              | 0.71     | 0.77     | N.A. | 8       | 70      | 26     | 64     |
| <b>Average N<sub>r</sub> dry deposition evaluation</b>            |                      |                   |          |          |      |         |         |        |        |
| HNO <sub>3</sub> (kg N ha <sup>-1</sup> )                         | CASTNet              | 4km               | 0.0084   | 0.0195   | 0.45 | 130     | 131     | 81.    | 83     |
| PNO <sub>3</sub> (kg N ha <sup>-1</sup> )                         | CASTNet              | 4km               | 0.0005   | 0.0007   | 0.10 | 28      | 84      | 15     | 76     |
| PNH <sub>4</sub> (kg N ha <sup>-1</sup> )                         | CASTNet              | 4km               | 0.0016   | 0.0023   | 0.21 | 26      | 53      | 27     | 49     |
| <b>Accumulated annual N<sub>r</sub> wet deposition evaluation</b> |                      |                   |          |          |      |         |         |        |        |
| PNO <sub>3</sub> (kg N ha <sup>-1</sup> )                         | NTN                  | 12km              | 0.58     | 0.36     | 0.77 | -38     | 40      | -58    | 60     |
| PNH <sub>4</sub> (kg N ha <sup>-1</sup> )                         | NTN                  | 12km              | 0.91     | 0.47     | 0.71 | -48     | 52      | -70    | 79     |

\*For more detailed model performance statistics, refer to UNC and Environ (2015), 1-the measured PNO<sub>3</sub> at CASTNet sites including fine and coarse mode, which should be greater than CAMx counterparts with only fine particulate nitrate, 2-the measured PNH<sub>4</sub> at CASTNet sites has negative bias so is a lower bound of “true” particulate ammonium.
